# Supplementary material for: Triapine Derivatives Act as Copper Delivery Vehicles to Induce Deadly Metal Overload in Cancer Cells
Source: PubMed Central journal article supplement (PMC7564244; doi:10.3390/biom10091336), 2020-09-19
Supplement: biomolecules-10-01336-s001.pdf [file biomolecules-10-01336-s001.pdf]

# Supporting Information

for

## Triapine Derivatives Act as Copper Delivery Vehicles to Induce Deadly Metal Overload in Cancer Cells

Kateryna Ohui,<sup>a,#</sup> Iryna Stepanenko,<sup>\*,a,#</sup> Iuliana Besleaga,<sup>a</sup> Maria V. Babak,<sup>b,c</sup> Radu Stafi,<sup>a</sup> Denisa Darvasiova,<sup>d</sup> Gerald Giester,<sup>e</sup> Vivien Pósa,<sup>f,g</sup> Éva A. Enyedy,<sup>f,g</sup> Daniel Vegh,<sup>h</sup> Peter Rapta,<sup>d</sup> Wee Han Ang,<sup>b,c</sup> Ana Popović-Bijelić,<sup>i</sup> Vladimir B. Arion<sup>\*,a</sup>

<sup>a</sup>*University of Vienna, Institute of Inorganic Chemistry, Währinger Strasse 42, A-1090 Vienna, Austria*

<sup>b</sup>*Department of Chemistry, National University of Singapore, 3 Science Drive 2, 117543 Singapore*

<sup>c</sup>*Drug Development Unit, National University of Singapore, 28 Medical Drive, 117546 Singapore*

<sup>d</sup>*Institute of Physical Chemistry and Chemical Physics, Slovak Technical University of Technology, Radlinského 9, 81237 Bratislava, Slovak Republic*

<sup>e</sup>*University of Vienna, Department of Mineralogy and Crystallography, Althan Strasse 14, A-1090 Vienna, Austria*

<sup>f</sup>*Department of Inorganic and Analytical Chemistry, Interdisciplinary Excellence Centre, University of Szeged, Dóm tér 7, H-6720 Szeged, Hungary*

<sup>g</sup>*MTA-SZTE Lendület Functional Metal Complexes Research Group, University of Szeged, Dóm tér 7, H-6720 Szeged, Hungary*

<sup>h</sup>*Institute of Organic Chemistry, Catalysis and Petrochemistry, Department of Organic Chemistry, Slovak Technical University of Technology, Radlinského 9, 81237 Bratislava, Slovak Republic*

<sup>i</sup>*Faculty of Physical Chemistry, University of Belgrade, 11158 Belgrade, Serbia*

# both co-authors contributed equally

\* corresponding author: vladimir.arion@univie.ac.at; iryna.stepanenko@univie.ac.at

## Content

|                                                                                                                                                                                              |          |
|----------------------------------------------------------------------------------------------------------------------------------------------------------------------------------------------|----------|
| Synthesis of <b>HL</b> <sup>1a</sup> along with synthetic pathway (Scheme S1)                                                                                                                | S3       |
| Tautomeric forms of <b>HL</b> <sup>1</sup> and <b>HL</b> <sup>2</sup> (Scheme S2)                                                                                                            | S4       |
| Atom numbering used for assignments in 1D and 2D NMR spectra of <b>HL</b> <sup>1</sup> and <b>HL</b> <sup>2</sup> (Scheme S3)                                                                | S4       |
| The tautomeric forms of <b>HL</b> <sup>2</sup> in solution (Scheme S4)                                                                                                                       | S4       |
| Preparative HPLC trace of [Cu( <b>HL</b> <sup>1</sup> )Cl <sub>2</sub> ] ( <b>1</b> ) (Figure S1)                                                                                            | S5       |
| ESI mass spectra of <b>1</b> ·H <sub>2</sub> O after HPLC (Figure S2)                                                                                                                        | S5       |
| Positive ion ESI mass spectrum of <b>3</b> ·0.75H <sub>2</sub> O (Figure S3)                                                                                                                 | S6       |
| The structure of the cation [ <b>H</b> <sub>3</sub> <b>L</b> <sup>1a</sup> ] <sup>2+</sup> in [ <b>H</b> <sub>3</sub> <b>L</b> <sup>1a</sup> ]Cl <sub>2</sub> ·2H <sub>2</sub> O (Figure S4) | S6       |
| pH-potentiometric titration curves for <b>HL</b> <sup>2</sup> (Figure S5)                                                                                                                    | S7       |
| UV-Vis spectra of <b>HL</b> <sup>1</sup> recorded at various pH values (Figure S6)                                                                                                           | S7       |
| Time dependence of the measured spectra of <b>HL</b> <sup>2</sup> at various pH values (Figure S7)                                                                                           | S8       |
| Time dependence of the measured spectra of <b>HL</b> <sup>1</sup> at various pH values (Figure S8)                                                                                           | S9       |
| Time-dependent UV-Vis spectra of (a) <b>HL</b> <sup>1</sup> and (b) <b>HL</b> <sup>2</sup> at pH 2.6 (Figure S9)                                                                             | S9       |
| Time-dependent UV-Vis spectra of (a) <b>1</b> and (b) <b>2</b> at various pH values (Figure S10)                                                                                             | S10      |
| Concentration-effect curves for <b>HL</b> <sup>1</sup> , <b>HL</b> <sup>2</sup> and <b>1-3</b> (Figure S11)                                                                                  | S10      |
| UV-Vis spectra of (a) <b>1</b> and (b) <b>2</b> in the presence of 120 equiv GSH (Figure S12)                                                                                                | S11      |
| EPR spectra of DMPO spin-adducts (Figures S13 and S14)                                                                                                                                       | S11, S12 |

**Synthesis of HL<sup>1a</sup>:** To 3-*N*-(*tert*-butyloxycarbonyl)amino-2-pyridinecarboxaldehyde (210 mg, 0.945 mmol) and 2-pyridinamidrazone (128.65 mg, 0.945 mmol) in ethanol/water (3/1, 8 mL) 12M HCl (0.173 mL, 2.08 mmol) was added dropwise. The resulting solution was stirred at room temperature for 2 h, then additional amount of 12M HCl (0.173 mL, 2.08 mmol) was added and the reaction mixture heated overnight at 85 °C to produce a yellow suspension. The yellow precipitate of [H<sub>3</sub>L<sup>1a</sup>]Cl<sub>2</sub>·2.5H<sub>2</sub>O was collected by filtration and dried in vacuo. The raw product was neutralised with saturated NaHCO<sub>3</sub> until pH 7-8 to produce HL<sup>1a</sup> (C<sub>12</sub>H<sub>12</sub>N<sub>6</sub>, 70 mg, 0.29 mmol, yield 31%). From the first filtrate (before neutralization) the yellow needle-like crystalline product of [H<sub>3</sub>L<sup>1a</sup>]Cl<sub>2</sub>·2H<sub>2</sub>O of X-ray diffraction quality was isolated. Anal. Calcd for [H<sub>3</sub>L<sup>1a</sup>]Cl<sub>2</sub>·2.5H<sub>2</sub>O (*M<sub>r</sub>* = 358.22), %: C, 40.23; H, 5.35; N, 23.46. Found, %: C, 40.17; H, 5.26; N, 23.32. Anal. Calcd for HL<sup>1a</sup>·0.1H<sub>2</sub>O (*M<sub>r</sub>* = 242.07), %: C, 59.54; H, 5.08; N, 34.72. Found, %: C, 59.63; H, 4.94; N, 34.39. <sup>1</sup>H NMR (HL<sup>1a</sup>, 500 MHz, DMSO-d<sub>6</sub>), δ, ppm: 8.86 (s, 1H), 7.95 (d, *J* = 2.9 Hz, 1H), 7.43 – 6.95 (m, 4H). ESI-MS for HL<sup>1a</sup> (MeCN/MeOH+1% H<sub>2</sub>O) positive: *m/z* 241.23 [HL<sup>1a</sup>+H]<sup>+</sup>, negative: *m/z* 239.11 [HL<sup>1a</sup>-H]<sup>-</sup>.

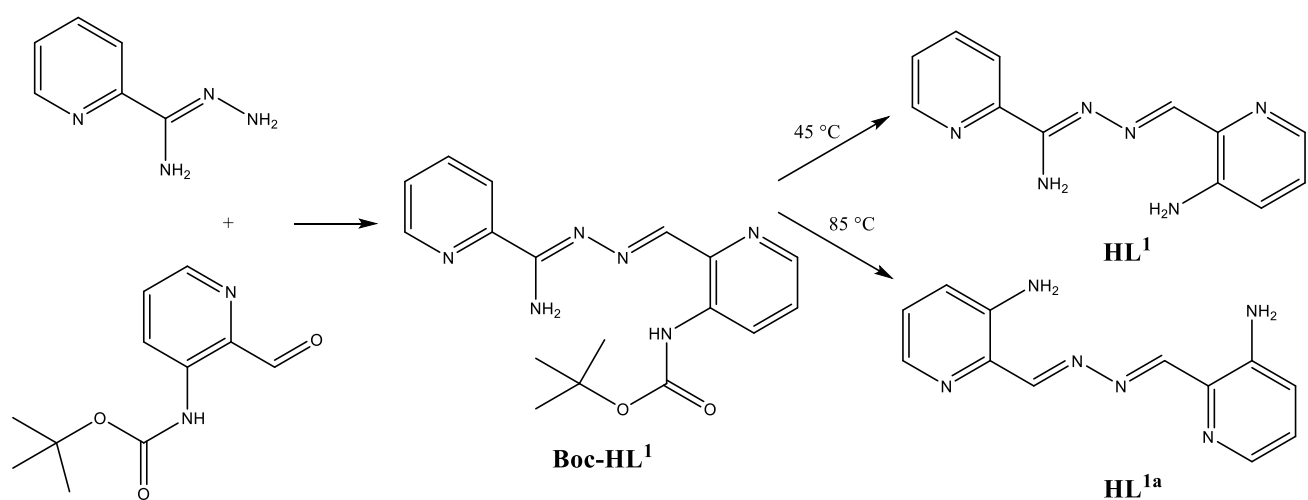

**Scheme S1.** Synthesis of HL<sup>1</sup> and HL<sup>1a</sup>.

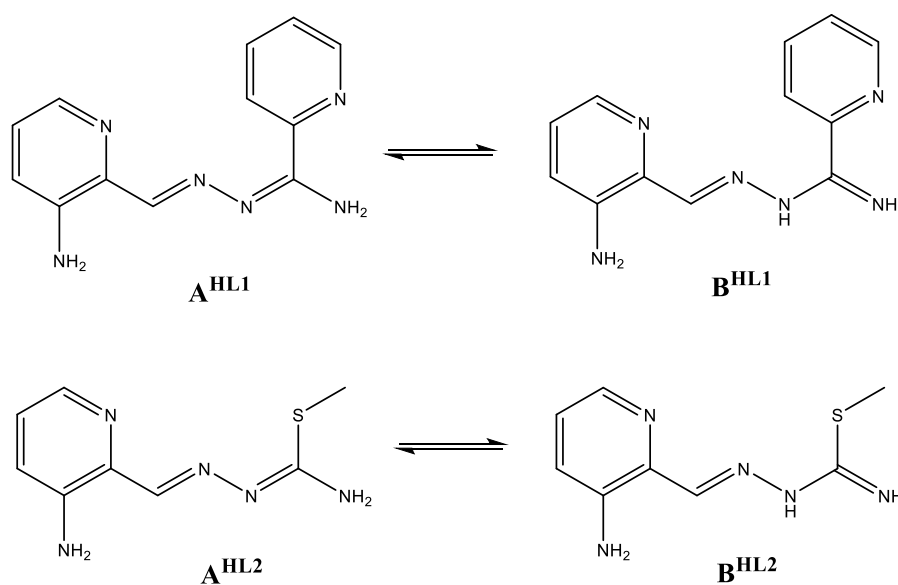

**Scheme S2.** The likely tautomeric forms for **HL<sup>1</sup>** and **HL<sup>2</sup>**.

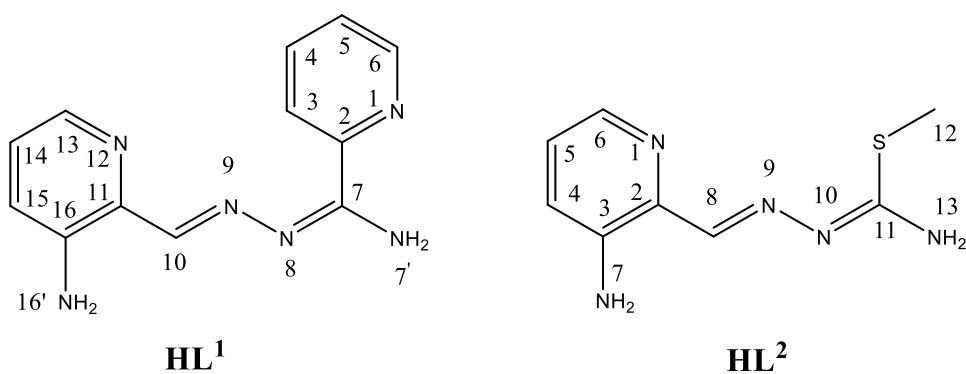

**Scheme S3.** Atom numbering used for assignments in 1D and 2D NMR spectra of **HL<sup>1</sup>** and **HL<sup>2</sup>**.

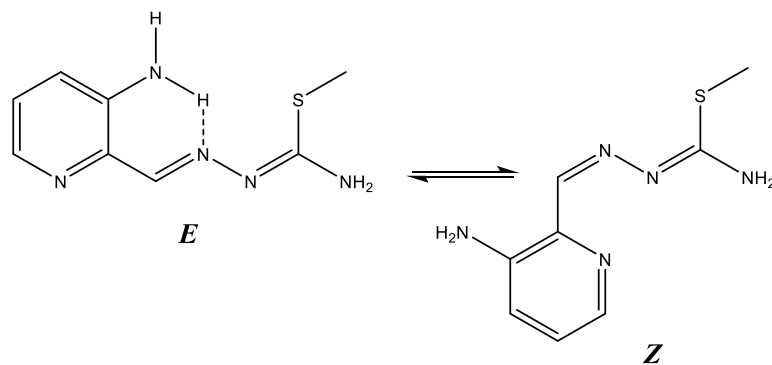

**Scheme S4.** The tautomeric forms of **HL<sup>2</sup>** in solution.

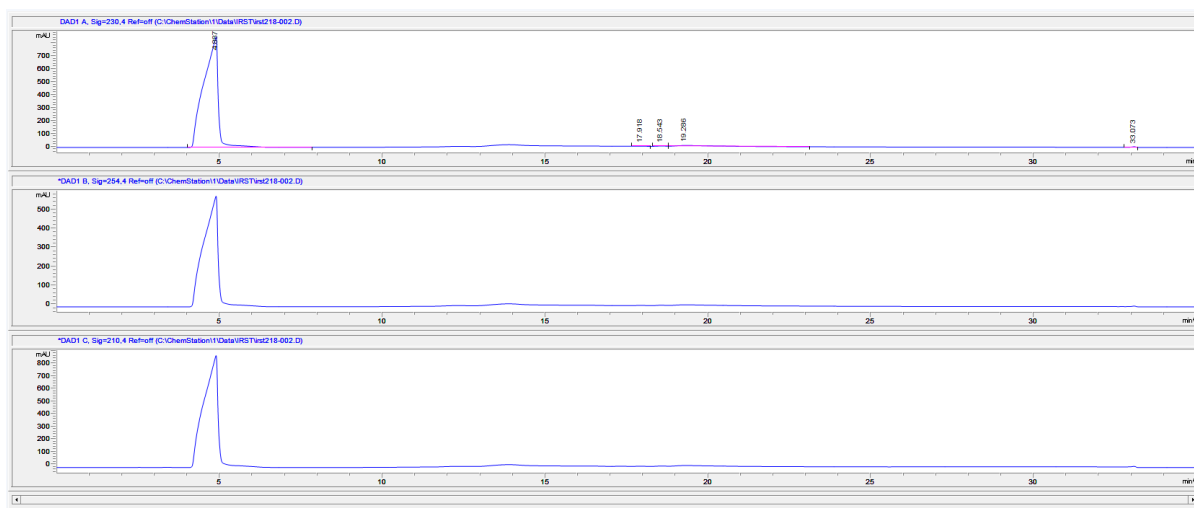

**Figure S1.** Preparative HPLC trace of  $[\text{Cu}(\text{HL}^1)\text{Cl}_2]$  (**1**).

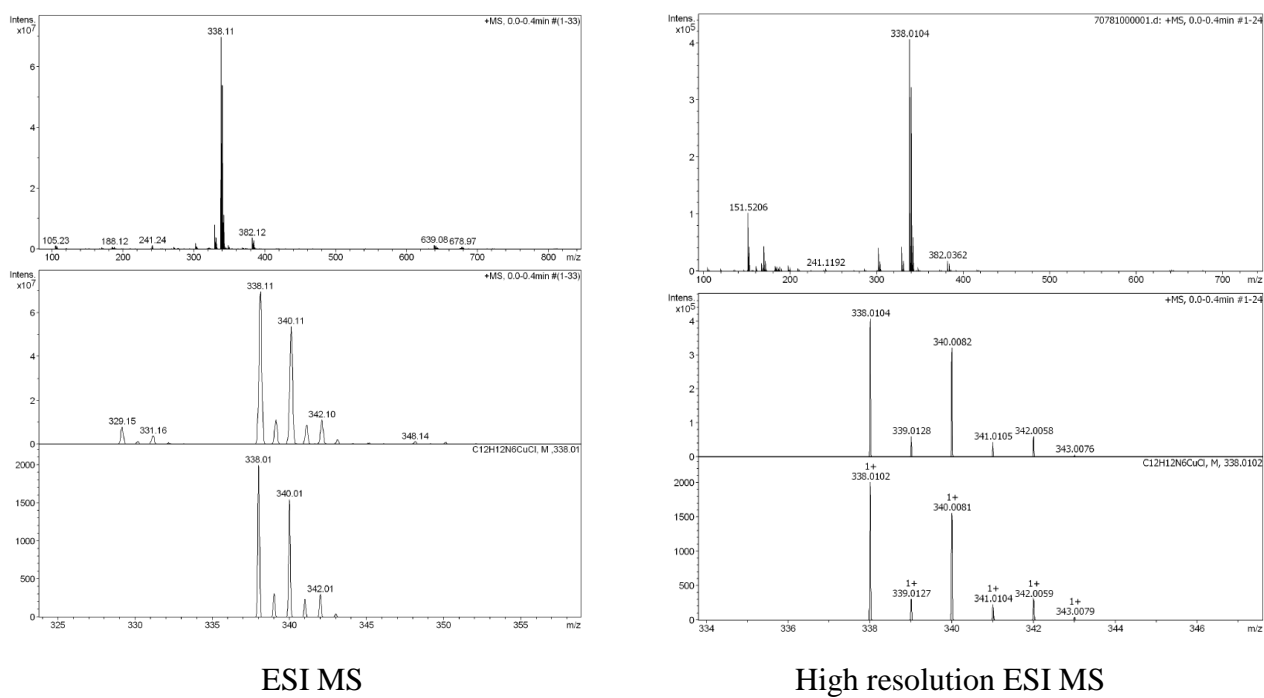

ESI MS

High resolution ESI MS

**Figure S2.** ESI mass spectra of  $\mathbf{1} \cdot \text{H}_2\text{O}$  after HPLC.

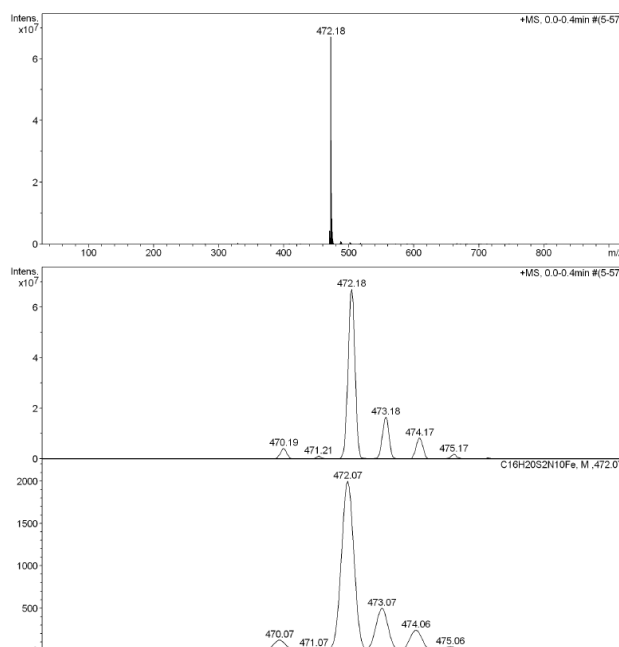

**Figure S3.** Positive ion ESI mass spectrum of  $3 \cdot 0.75\text{H}_2\text{O}$ . The peak at  $m/z$  472.18 is attributed to  $[\text{Fe}(\text{L}^2)_2]^+$ .

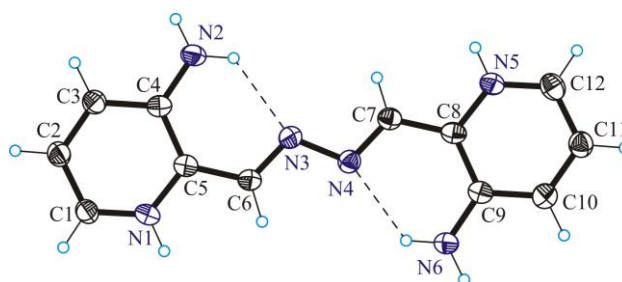

**Figure S4.** The structure of the cation  $[\text{H}_3\text{L}^{1a}]^{2+}$  in  $[\text{H}_3\text{L}^{1a}]\text{Cl}_2 \cdot 2\text{H}_2\text{O}$ . Selected bond distances (Å) and torsion angles (deg): C4–N2 1.339(4), C4–C5 1.422(5), C5–C6 1.431(5), C6–N3 1.291(4), N3–N4 1.398(4), N4–C7 1.290(4), C7–C8 1.437(5), C8–C9 1.421(5), C9–N6 1.342(4); C6–N3–N4–C7  $-179.3(3)$ . H-bond parameters: N2–H $\cdots$ N3 [N2 $\cdots$ N3 2.778(4) Å, N2–H $\cdots$ N3 129.4°]; N6–H $\cdots$ N4 [N6 $\cdots$ N4 2.772(4) Å, N6–H $\cdots$ N4 129.7°].

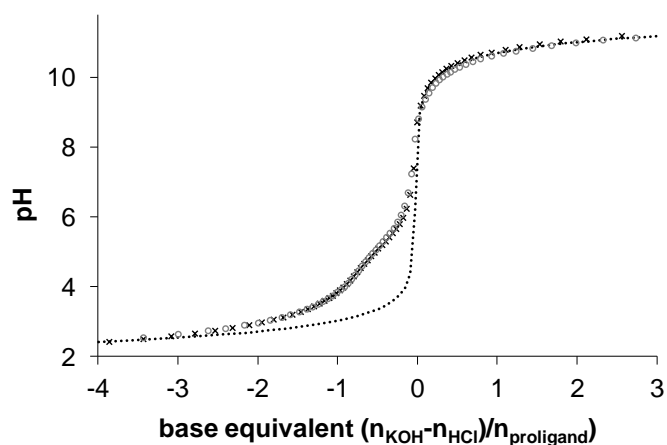

**Figure S5.** pH-potentiometric titration curves for **HL<sup>2</sup>**: direct (×) and back-titration (○); and for HCl (dotted line) for comparison in pure water.  $\{c_L = 3 \text{ mM}; T = 298 \text{ K}; I = 0.10 \text{ M (KCl)}\}$

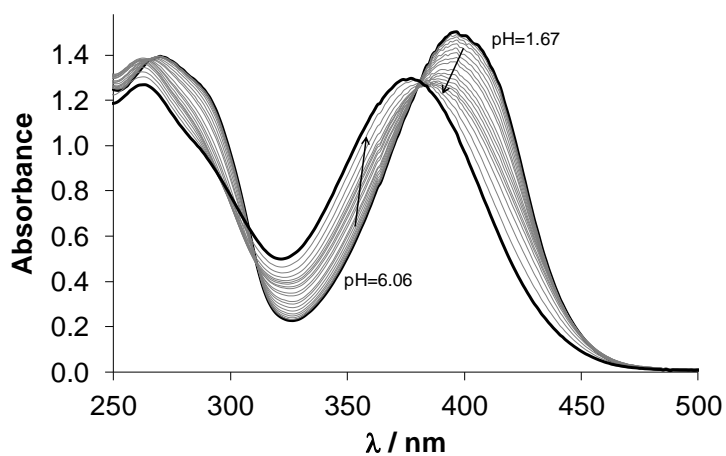

**Figure S6.** UV-Vis spectra of **HL<sup>1</sup>** recorded at various pH values.  $\{c_L = 100 \text{ } \mu\text{M}; T = 298 \text{ K}; I = 0.10 \text{ M (KCl)}; \ell = 1.0 \text{ cm}; 1\% \text{ (v/v) DMSO}\}$

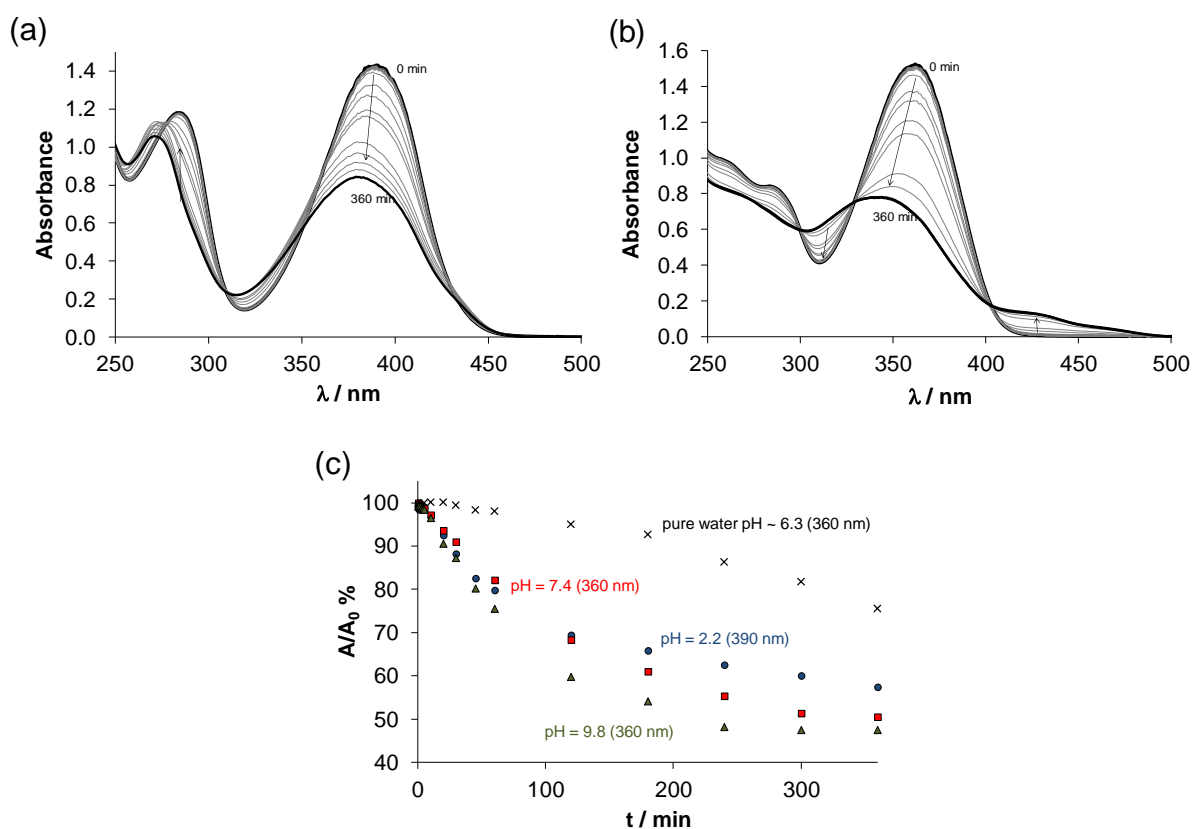

**Figure S7.** Time dependence of the measured spectra of  $\text{HL}^2$  at various pH values: (a) 2.2; (b) 9.8 and changes of the absorbance values (as  $A/A_0$ ) at the different pH values and in pure water (without buffer and KCl, pH = 6.3)  $\{c_L = 100 \mu\text{M}; T = 298 \text{ K}; I = 0.10 \text{ M (KCl)}; \ell = 1.0 \text{ cm}; 1\% (v/v) \text{ DMSO}\}$ .



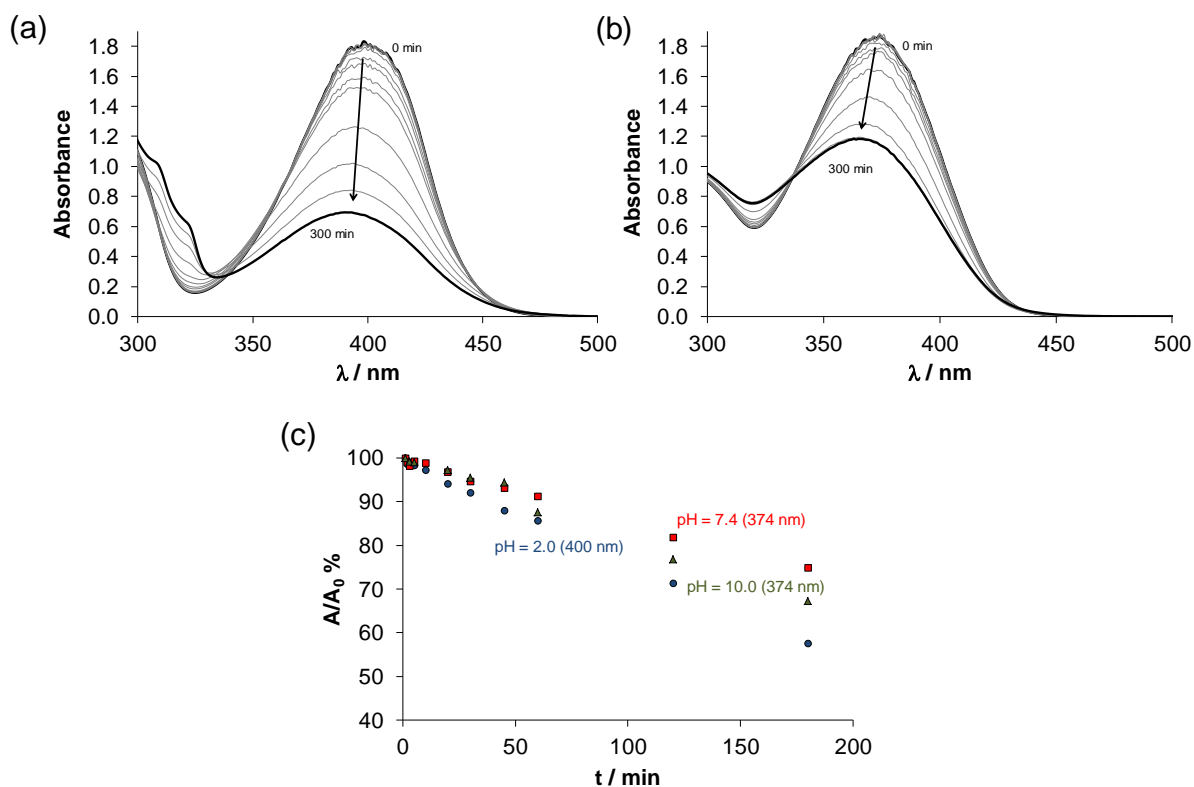

**Figure S8.** Time dependence of the measured spectra of  $\text{HL}^1$  at various pH values: (a) 2.0; (b) 10.0 and (c) changes of the absorbance values (as  $A/A_0$ )  $\{c_L = 100 \mu\text{M}; T = 298 \text{ K}; I = 0.10 \text{ M (KCl)}; \ell = 1.0 \text{ cm}; 1\% \text{ (v/v) DMSO}\}$ .

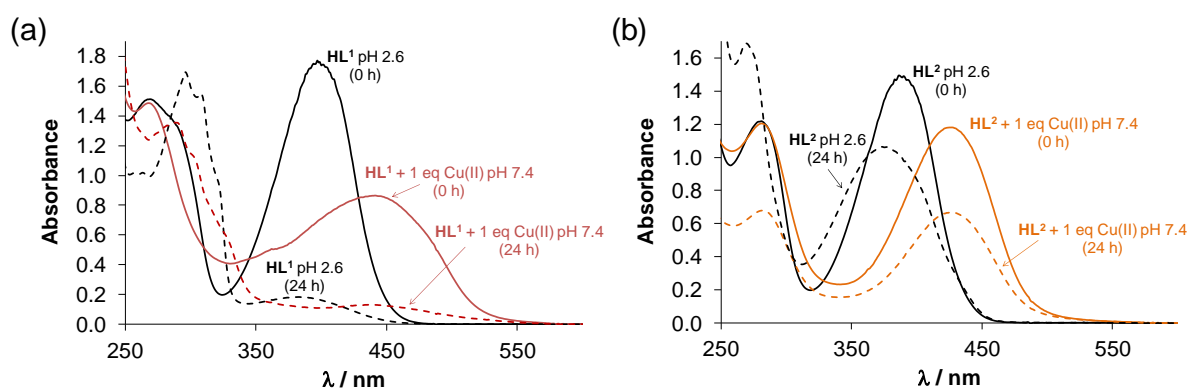

**Figure S9.** UV-Vis spectra of (a)  $\text{HL}^1$  and (b)  $\text{HL}^2$  at pH 2.6 measured immediately (0 h) and after 24 h in addition to spectra recorded for the ligand samples kept for 0 or 24 h at pH 2.6 in the presence of 1 equiv Cu(II) ion at pH 7.4  $\{c_L = 100 \mu\text{M}; T = 298 \text{ K}; I = 0.10 \text{ M (KCl)}; \ell = 1.0 \text{ cm}; 1\% \text{ (v/v) DMSO}\}$ .

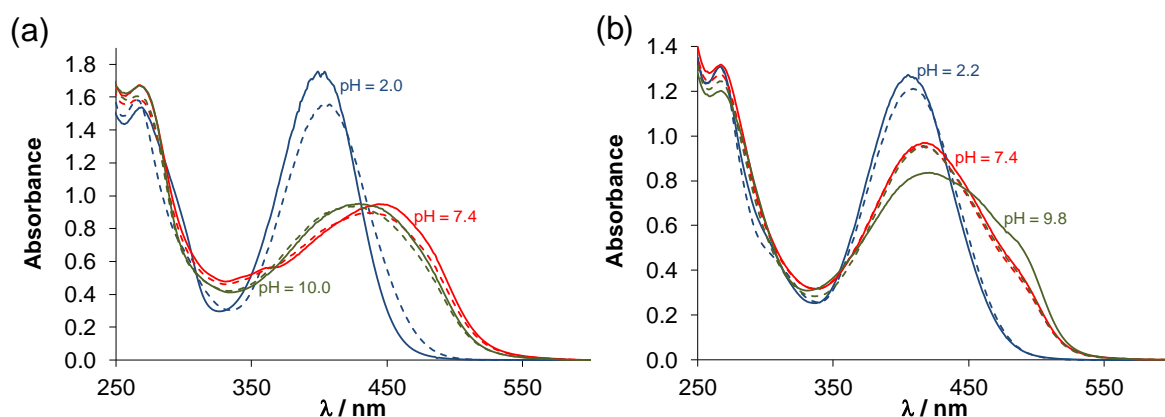

**Figure S10.** UV-Vis spectra of (a) **1** and (b) **2** at various pH values measured immediately upon dissolution (solid lines) and after 24 h (dashed lines)  $\{c_{complex} = 100 \mu M; T = 298 K; I = 0.10 M (KCl); \ell = 1.0 cm; 1\% (v/v) DMSO\}$ .

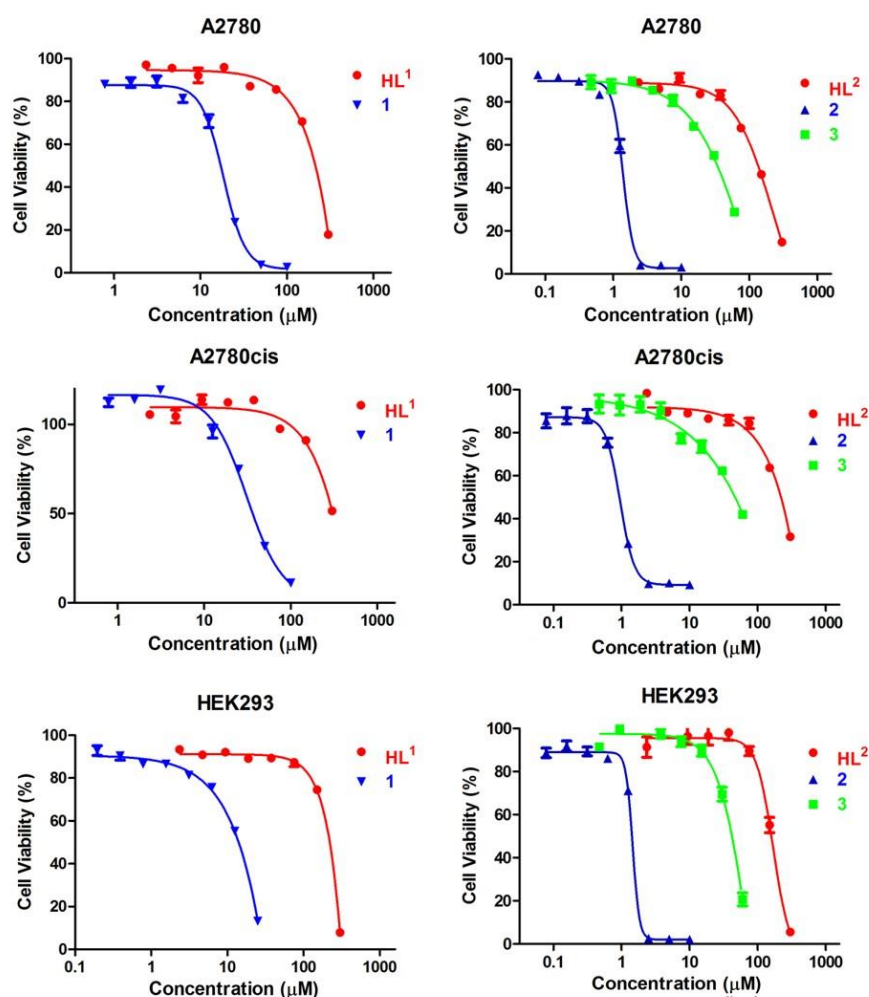

**Figure S11.** Concentration-effect curves for **HL**<sup>1</sup>, **HL**<sup>2</sup> and **1-3** in A2780, A2780cis and HEK293 cell lines upon 72 h exposure.

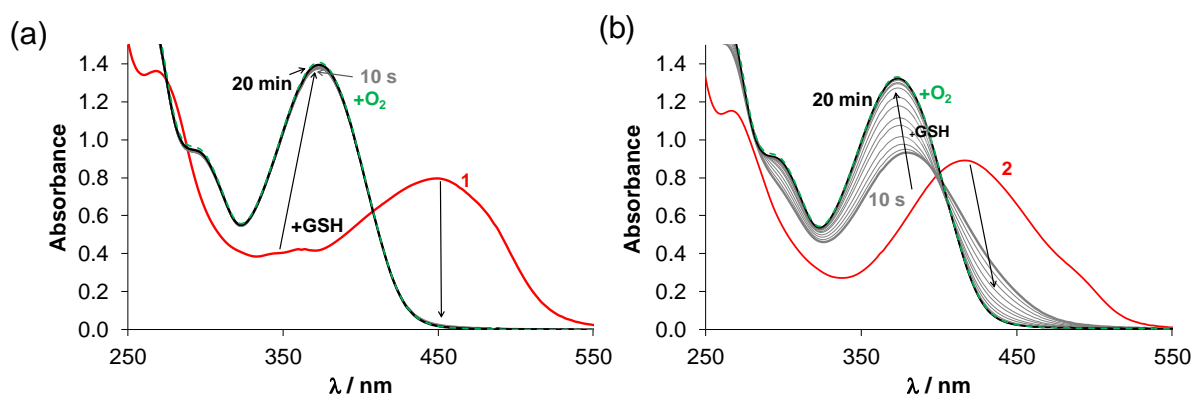

**Figure S12.** UV-Vis spectra of (a) **1** and (b) **2** in the presence of 120 equiv GSH before (red lines) and after (black and grey lines) mixing their solutions in a tandem cuvette, and the effect of the addition of O<sub>2</sub> to the sample followed by the reaction (green dashed lines) { $c_{\text{complex}} = 100 \mu\text{M}$ ;  $c_{\text{GSH}} = 12.0 \text{ mM}$ ;  $\text{pH} = 7.40$  (50 mM HEPES);  $T = 298 \text{ K}$ ;  $I = 0.10 \text{ M}$  (KCl);  $\ell = 1.0 \text{ cm}$ ; 1% (v/v) DMSO}.

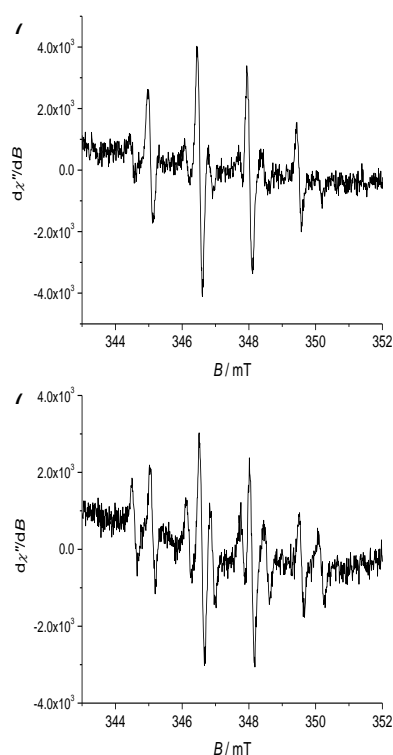

**Figure S13.** EPR spectra of DMPO spin-adducts measured in the 1% (v/v) DMSO/H<sub>2</sub>O) + DMPO + (a) **Fe(II)-(HL<sup>2</sup>)<sub>2</sub>** or (b) **Fe(II)-(3AP)<sub>2</sub>** (prepared by the reaction of the corresponding ligand with FeSO<sub>4</sub>·6H<sub>2</sub>O at 1:2 iron-to-ligand mole ratio) + H<sub>2</sub>O<sub>2</sub> system measured on air after 2 min of reactions: Initial concentrations:  $c_0(\text{Fe(II)-(HL}^2)_2)$  or  $c_0\text{Fe(II)-(3AP)}_2 = 0.4 \text{ mM}$ ,  $c_0(\text{H}_2\text{O}_2) = 0.01 \text{ M}$ ,  $c_0(\text{DMPO}) = 0.04 \text{ M}$ .

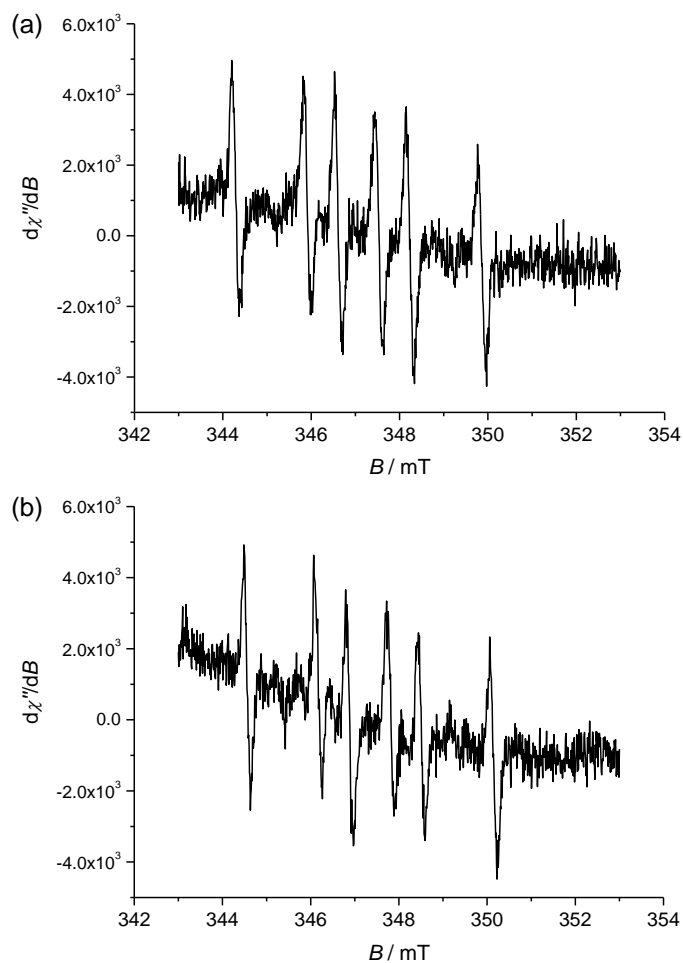

**Figure S14.** EPR spectra of DMPO spin-adducts measured in 5% (v/v) DMSO/H<sub>2</sub>O) + DMPO + (a) **Fe(II)-(HL<sup>2</sup>)<sub>2</sub>** or (b) **Fe(II)-(3AP)<sub>2</sub>** (prepared by the reaction of the corresponding ligand with FeSO<sub>4</sub>·6H<sub>2</sub>O at 1:2 iron-to-ligand mole ratio) + H<sub>2</sub>O<sub>2</sub> system measured on air after 10 min of reactions: Initial concentrations:  $c_0(\text{Fe(II)-(HL}^2)_2)$  or  $c_0\text{Fe(II)-(3AP)}_2 = 0.4 \text{ mM}$ ,  $c_0(\text{H}_2\text{O}_2) = 0.01 \text{ M}$ ,  $c_0(\text{DMPO}) = 0.04 \text{ M}$ .
